# Supplementary material for: Understanding Older People’s Readiness for Receiving Telehealth: Mixed-Method Study
Source: PubMed Central journal article supplement (PMC5910535; doi:10.2196/jmir.8407), 2018-04-06
Supplement: jmir_v20i4e123_app1.pdf [file jmir_v20i4e123_app1.pdf]

## Appendix 1. Literature review, search terms and hits

| Source         | Search terms                                                                                                                                                                                                                                                                                                                                                                                                       | Hits             | Selected for use |
|----------------|--------------------------------------------------------------------------------------------------------------------------------------------------------------------------------------------------------------------------------------------------------------------------------------------------------------------------------------------------------------------------------------------------------------------|------------------|------------------|
| PubMed         | ((older adults[title/abstract] OR older people[title/abstract] OR seniors[title/abstract] OR elderly[title/abstract]) AND (technology[title/abstract])) AND intention[title/abstract] AND (factors [title/abstract] OR determinants[title/abstract] OR associations[title/abstract]))                                                                                                                              | 22               | 6 <sup>1</sup>   |
| CINAHL         | (AB older adults OR AB older people OR AB seniors OR AB elderly) AND (AB technology) AND (intention) AND (AB factors OR AB determinants OR AB associations)                                                                                                                                                                                                                                                        | 8                | 1 <sup>2</sup>   |
| ScienceDirect  | TITLE-ABSTR-KEY("older adults") or TITLE-ABSTR-KEY(elderly) or TITLE-ABSTR-KEY("older people") or TITLE-ABSTR-KEY(seniors) and TITLE-ABSTR-KEY(technology) and TITLE-ABSTR-KEY(intention) and TITLE-ABSTR-KEY(factors) or TITLE-ABSTR-KEY(determinants) or TITLE-ABSTR-KEY(associations)                                                                                                                           | 23               | 2 <sup>3</sup>   |
| Google Scholar | allintitle: (older OR elderly OR seniors) AND technology AND (intention) AND (factors OR determinants OR associations)                                                                                                                                                                                                                                                                                             | 0                | 0                |
| Web of Science | TS=(older adults OR seniors OR elderly OR older people) AND TS=(technology) AND TS=(intention) AND TS=(factors OR determinants OR associations)                                                                                                                                                                                                                                                                    | 84               | 10 <sup>4</sup>  |
| Scopus         | ( TITLE-ABS-KEY ( older AND people ) OR TITLE-ABS-KEY ( older AND adults ) OR TITLE-ABS-KEY ( elderly ) OR TITLE-ABS-KEY ( seniors ) ) AND ( TITLE-ABS-KEY ( technology ) ) AND TITLE-ABS-KEY ( intention ) AND ( TITLE-ABS-KEY ( factors ) OR TITLE-ABS-KEY ( determinants ) OR TITLE-ABS-KEY ( associations ) ) AND PUBYEAR > 2006 AND ( LIMIT-TO ( LANGUAGE , "English" ) ) AND ( LIMIT-TO ( DOCTYPE , "ar" ) ) | 95               | 7 <sup>5</sup>   |
| PsycINFO       | ((Older adults or Older people or Elderly or Seniors) and Technology and (Intention) and (Factors or Determinants or Associations)).tw.                                                                                                                                                                                                                                                                            | 17               | 2 <sup>6</sup>   |
|                |                                                                                                                                                                                                                                                                                                                                                                                                                    | Selected         | 29               |
|                |                                                                                                                                                                                                                                                                                                                                                                                                                    | Duplicates       | 18               |
|                |                                                                                                                                                                                                                                                                                                                                                                                                                    | Finally included | 11               |

1. Tsai et al. (2017) [14]; Hoque & Sorwar (2017) [15]; Cajita et al. (2017) [16]; de Veer et al. (2015) [8]; Tsai (2014) [17]; Tsai et al. (2013) [18]
2. Hoque & Sorwar (2017) [15]; Wang et al. (2011) [19]
3. Hoque & Sorwar (2017) [15]; Braun (2013) [20]
4. Tsai et al. (2017) [14]; Hoque & Sorwar (2017) [15]; Wang & Sun (2016) [21]; de Veer et al. (2015) [8]; Tsai (2014) [17]; Sintonen & Immonen (2013) [22]; Braun (2013) [20]; Tsai et al. (2013) [18]; Shah et al. (2012) [23]; Wang et al. (2011) [19]
5. Tsai et al. (2017) [14]; Hoque & Sorwar (2017) [15]; Wang & Sun (2016) [21]; de Veer et al. (2015) [8]; Tsai (2014) [17]; Braun (2013) [20]; Wang et al. (2011) [19]
6. Braun (2013) [20]; Wang et al. (2011) [19]
